# Supplementary material
Source: PubMed Central journal article supplement (PMC5523028)
Supplement: ajcr0007-1463-f8.pdf [file ajcr0007-1463-f8.pdf]

## DGCR5/miR-1180 axis in lung cancer

**Supplementary Table 1.** Part I RegRNA predicted DGCR5 regulated miRNAs

| No. | miRNA ID        | Location  | Len | Minimum free energy |
|-----|-----------------|-----------|-----|---------------------|
| 1   | hsa-let-7b      | 494~519   | 26  | -27.7               |
| 2   | hsa-miR-1180    | 59~82     | 24  | -26.4               |
| 3   | hsa-miR-1181    | 30~52     | 23  | -28.8               |
| 4   | hsa-miR-1183    | 432~458   | 27  | -26.4               |
| 5   | hsa-miR-1225-3p | 2050~2072 | 23  | -29.2               |
| 6   | hsa-miR-1233    | 2437~2455 | 19  | -26.8               |
|     |                 | 2437~2455 | 19  | -26.8               |
| 7   | hsa-miR-1254    | 3090~3121 | 32  | -26.7               |
| 8   | hsa-miR-1296    | 2435~2457 | 23  | -26.3               |
|     |                 | 2511~2537 | 27  | -27.2               |
| 9   | hsa-miR-1469    | 2909~2929 | 21  | -30.6               |
| 10  | hsa-miR-1470    | 3009~3029 | 21  | -30.3               |
| 11  | hsa-miR-1538    | 2905~2932 | 28  | -28.9               |
| 12  | hsa-miR-185*    | 2230~2252 | 23  | -26.5               |
| 13  | hsa-miR-1976    | 1885~1905 | 21  | -28.1               |
| 14  | hsa-miR-2277-3p | 2439~2459 | 21  | -27.2               |
| 15  | hsa-miR-2861    | 985~1003  | 19  | -29.2               |
| 16  | hsa-miR-298     | 824~851   | 28  | -26.3               |
| 17  | hsa-miR-3130-5p | 69~89     | 21  | -33.8               |
|     |                 | 69~89     | 21  | -33.8               |
| 18  | hsa-miR-3132    | 1399~1422 | 24  | -27.7               |
|     |                 | 3044~3066 | 23  | -26.9               |
| 19  | hsa-miR-3154    | 1286~1307 | 22  | -26.2               |
| 20  | hsa-miR-3177    | 2977~2997 | 21  | -28                 |
| 21  | hsa-miR-3180-3p | 71~97     | 27  | -30.3               |
|     |                 | 71~97     | 27  | -30.3               |
|     |                 | 71~97     | 27  | -30.3               |
| 22  | hsa-miR-3180    | 74~97     | 24  | -28.2               |
|     |                 | 74~97     | 24  | -28.2               |
| 23  | hsa-miR-3181    | 46~69     | 24  | -28.9               |
| 24  | hsa-miR-3189    | 339~365   | 27  | -26.6               |
| 25  | hsa-miR-3194    | 2054~2075 | 22  | -27.3               |
| 26  | hsa-miR-3196    | 107~126   | 20  | -26.2               |
| 27  | hsa-miR-324-5p  | 2051~2073 | 23  | -26.6               |
| 28  | hsa-miR-339-3p  | 3154~3174 | 21  | -27.4               |
| 29  | hsa-miR-3605-3p | 2879~2905 | 27  | -27.3               |
| 30  | hsa-miR-3619    | 2832~2853 | 22  | -30.2               |
| 31  | hsa-miR-3621    | 104~123   | 20  | -29.3               |
| 32  | hsa-miR-3907    | 321~341   | 21  | -27                 |
| 33  | hsa-miR-3937    | 458~480   | 23  | -29.9               |
| 34  | hsa-miR-3943    | 2042~2071 | 30  | -33.9               |
| 35  | hsa-miR-3944    | 38~69     | 32  | -41.6               |
| 36  | hsa-miR-4254    | 2667~2687 | 21  | -27.5               |
| 37  | hsa-miR-4259    | 475~498   | 24  | -29.1               |
| 38  | hsa-miR-4292    | 54~71     | 18  | -28.2               |

## DGCR5/miR-1180 axis in lung cancer

|    |                |           |    |        |
|----|----------------|-----------|----|--------|
| 39 | hsa-miR-4298   | 2244~2266 | 23 | -27    |
| 40 | hsa-miR-4322   | 987~1006  | 20 | -26.7  |
| 41 | hsa-miR-486-5p | 2863~2884 | 22 | -28.8  |
| 42 | hsa-miR-508-5p | 142~163   | 22 | -28.1  |
| 43 | hsa-miR-612    | 3095~3119 | 25 | -29.1  |
|    |                | 850~881   | 32 | -26.93 |
| 44 | hsa-miR-637    | 1932~1955 | 24 | -27.1  |
|    |                | 2966~2989 | 24 | -31.6  |
| 45 | hsa-miR-638    | 80~115    | 36 | -35.8  |
| 46 | hsa-miR-657    | 1850~1871 | 22 | -27.2  |
| 47 | hsa-miR-661    | 979~1001  | 23 | -26.8  |
| 48 | hsa-miR-663    | 107~129   | 23 | -37.7  |
|    |                | 455~478   | 24 | -32.3  |
| 49 | hsa-miR-665    | 820~840   | 21 | -26.6  |
|    |                | 2527~2545 | 19 | -26.3  |
| 50 | hsa-miR-762    | 44~67     | 24 | -31.2  |
|    |                | 304~334   | 31 | -26.91 |
| 51 | hsa-miR-939    | 456~476   | 21 | -30.2  |
|    |                | 3090~3114 | 25 | -29.4  |
| 52 | hsa-miR-940    | 3016~3048 | 33 | -28.1  |

---
